# Supplementary material for: Naproxen release aspect from boron-doped carbon nanodots as a bifunctional agent in cancer therapy
Source: Royal Society of Chemistry journal article supplement (doi:10.1039/d1ra06148h), 2021-01-01
Supplement: d1ra06148h1.pdf [file d1ra06148h1.pdf]

## Supporting information

### **Naproxen release aspect from Boron-doped carbon nanodots as bifunctional agent on cancer therapy**

Aswandi Wibrianto<sup>a</sup>, Dinar F. Putri<sup>a</sup>, Satya C. W. Sakti<sup>a,b</sup>, Hwei V. Lee<sup>c</sup>, and Mochamad Z. Fahmi<sup>\*a,b</sup>

*<sup>a</sup>Department of Chemistry, Universitas Airlangga, Surabaya 61115, Indonesia.*

*<sup>b</sup>Supramodification Nano-Micro Engineering Research Group, Universitas Airlangga, Surabaya  
60115, Indonesia*

*<sup>c</sup>Nanotechnology and Catalysis Research Centre, Institute of Postgraduate Studies (IPS),  
University of Malaya, Kuala Lumpur, 50603, Malaysia*

Corresponding author: [m.zakki.fahmi@fst.unair.ac.id](mailto:m.zakki.fahmi@fst.unair.ac.id); Fax: +62-31-5922427; Tel: +62-31-5922427

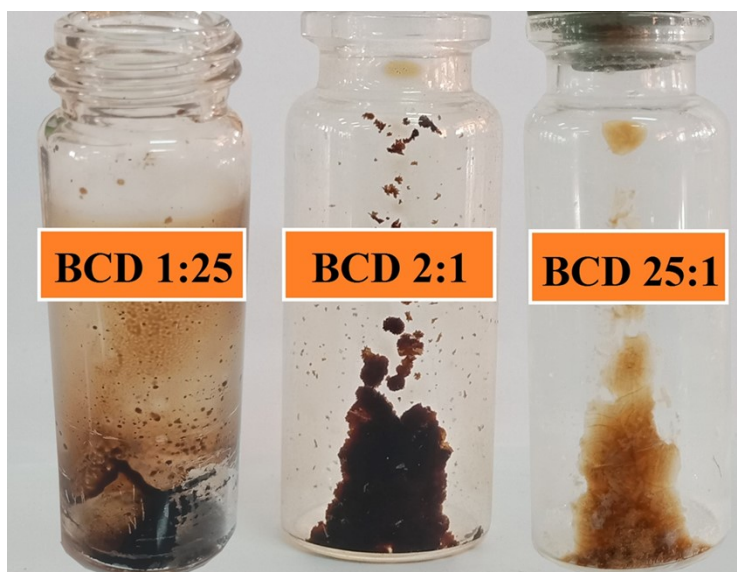

**Fig. S1.** Photographs of synthesized BCD after being heated at 240 °C for 4 h.

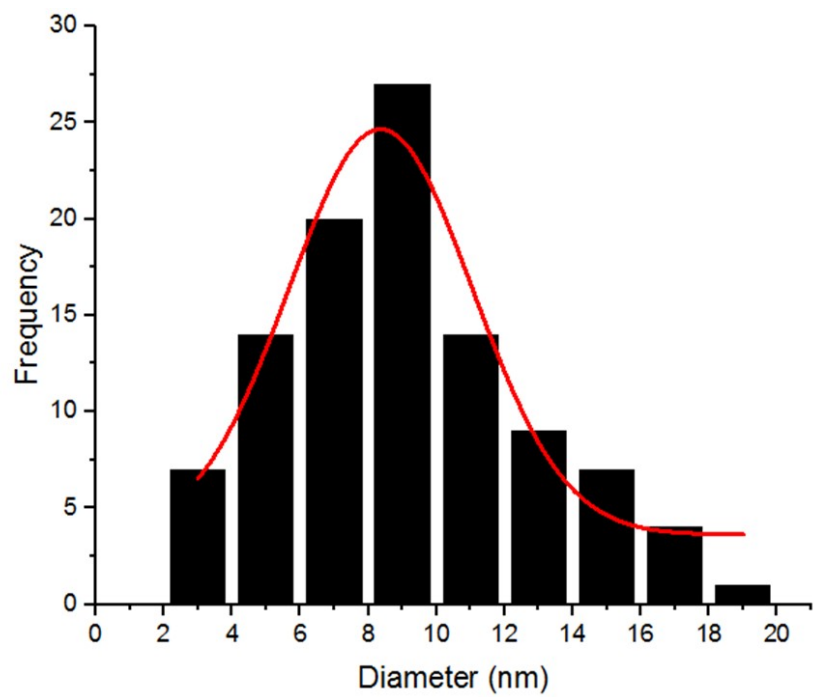

**Fig. S2.** The AFM histogram of BCD, analyzed by Gaussian model in origin software.

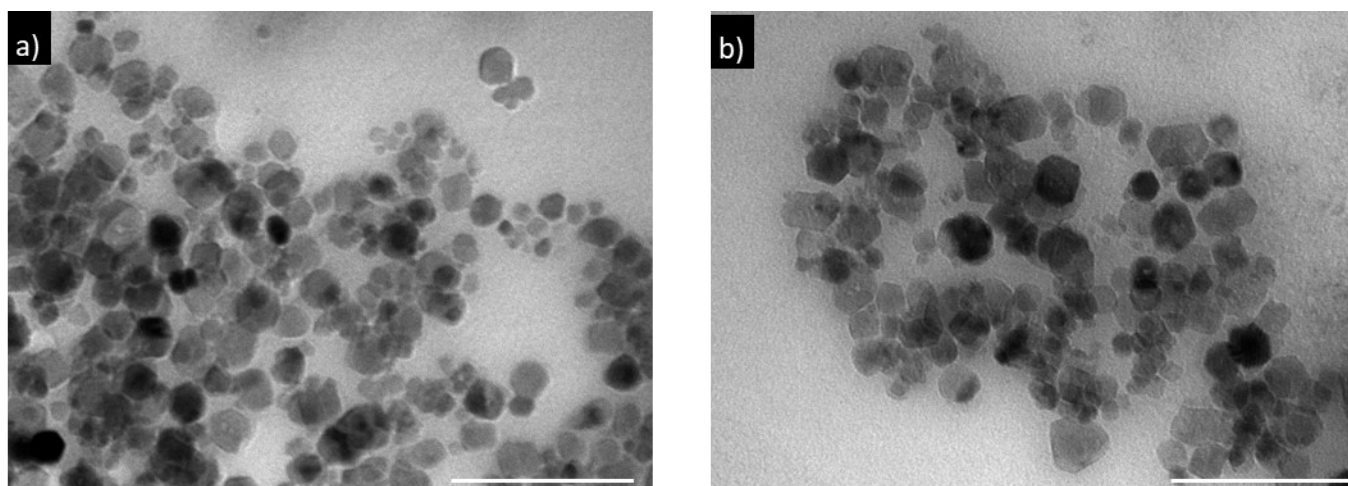

**Fig. S3.** TEM images of (a) BCD and (b) N-BCD. The with bars reperset 100 nm.

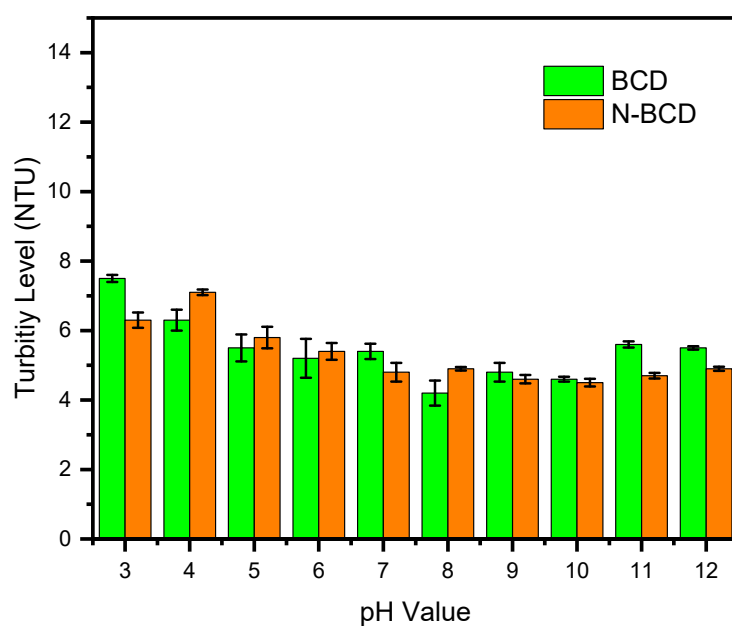

**Fig. S4.** Turbidity data of BCD and N-BCD on varied pH value after 72 h (n=3).

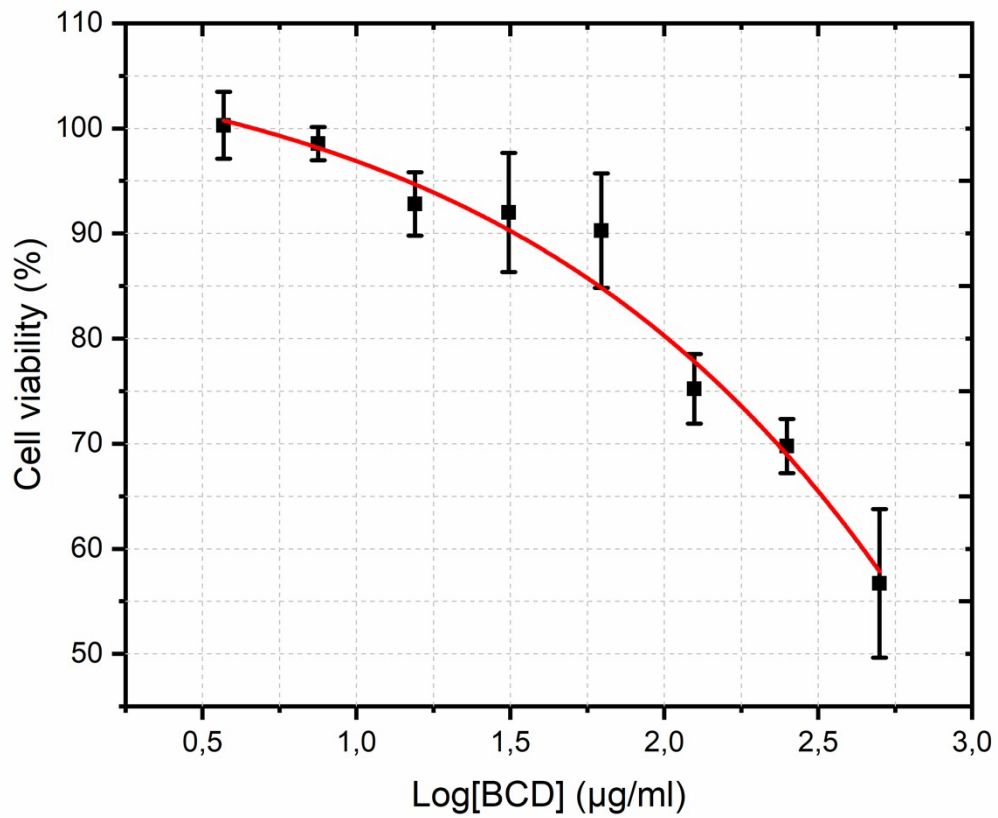

**Fig. S5.** The cytotoxicity concentration of BCD towards HeLa cell lines ( $2.5 \times 10^4$  cells/well) with varied concentrations (up to 500 µg/ml) after 24 h incubation at 37 °C and 5% CO<sub>2</sub> condition.

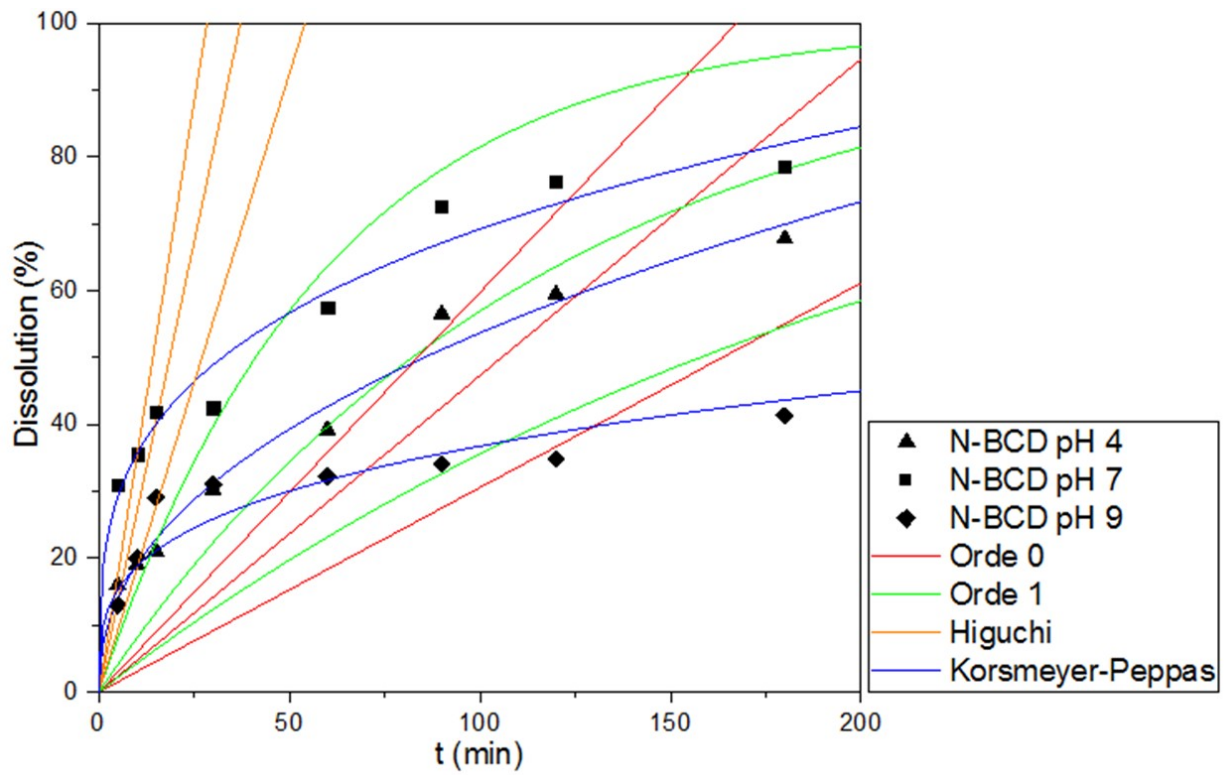

**Fig. S6.** Kinetical release curve of naproxen-loaded BCD under varied pH (4, 7, and 9) with theoretical approaches, including zero-order (red line), first-order (green line), Higuchi (orange line), and Korsmeyer–Peppas model (blue line).
